# Supplementary material for: Treatment plan quality during online adaptive re-planning
Source: Springer Nature journal article supplement (doi:10.1186/s13014-020-01641-0), 2020-08-21
Supplement: MOESM1 [file 18305966]

## Supplementary Material

---

### *Treatment plan quality during online adaptive re-planning*

Janita van Timmeren, Madalyne Chamberlain, Jérôme Krayenbuehl, Lotte Wilke, Stefanie Ehrbar, Marta Bogowicz, Mariangela Zamburlini, Nicolaus Andratschke, Helena Garcia, Matea Pavic, Panagiotis Balermipas, Chaehee Ryu, Matthias Guckenberger, Stephanie Tanadini-Lang

- 1. PTV changes**
- 2. Weighted versus full optimization**
- 3. Average differences per patient**

## 1. PTV changes

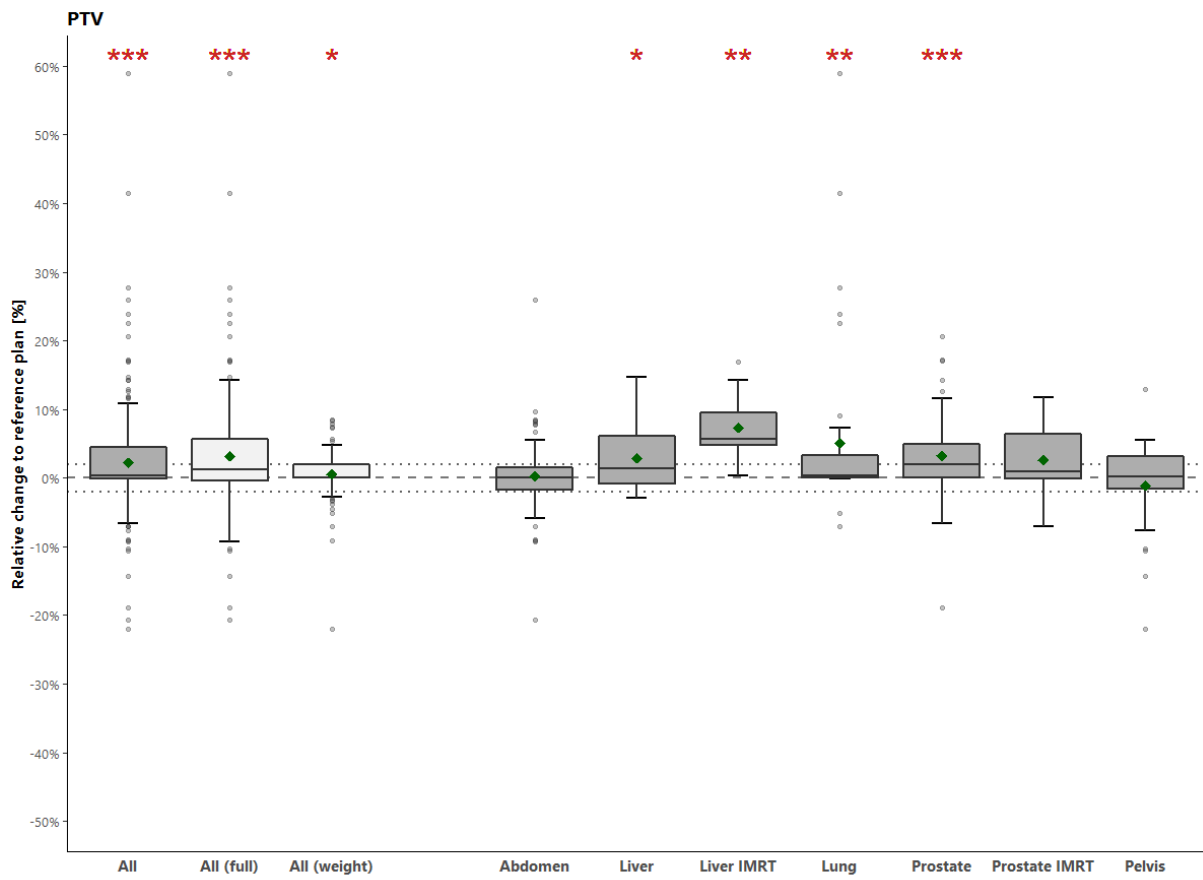

Figure S1: Boxplots indicating the relative difference in PTV of the adapted plans compared to the respective reference treatment plans. Diamonds indicate the mean. Dashed lines indicate 0% and dotted lines indicate  $\pm 2\%$  differences. Asterisks indicate significance:  $p$ -value $<0.05$  (\*),  $p$ -value $<0.01$  (\*\*) and  $p$ -value $<0.001$  (\*\*).

## 2. Weighted versus full optimization

In this analysis, the difference in dose parameters between the online-adapted treatment plans and the reference plans were calculated for those plans that were optimized with the full optimization or weight optimization strategy. Note that all online-adapted plans were pooled together; the analysis was not performed per treatment site due to low patient numbers in each subgroup.

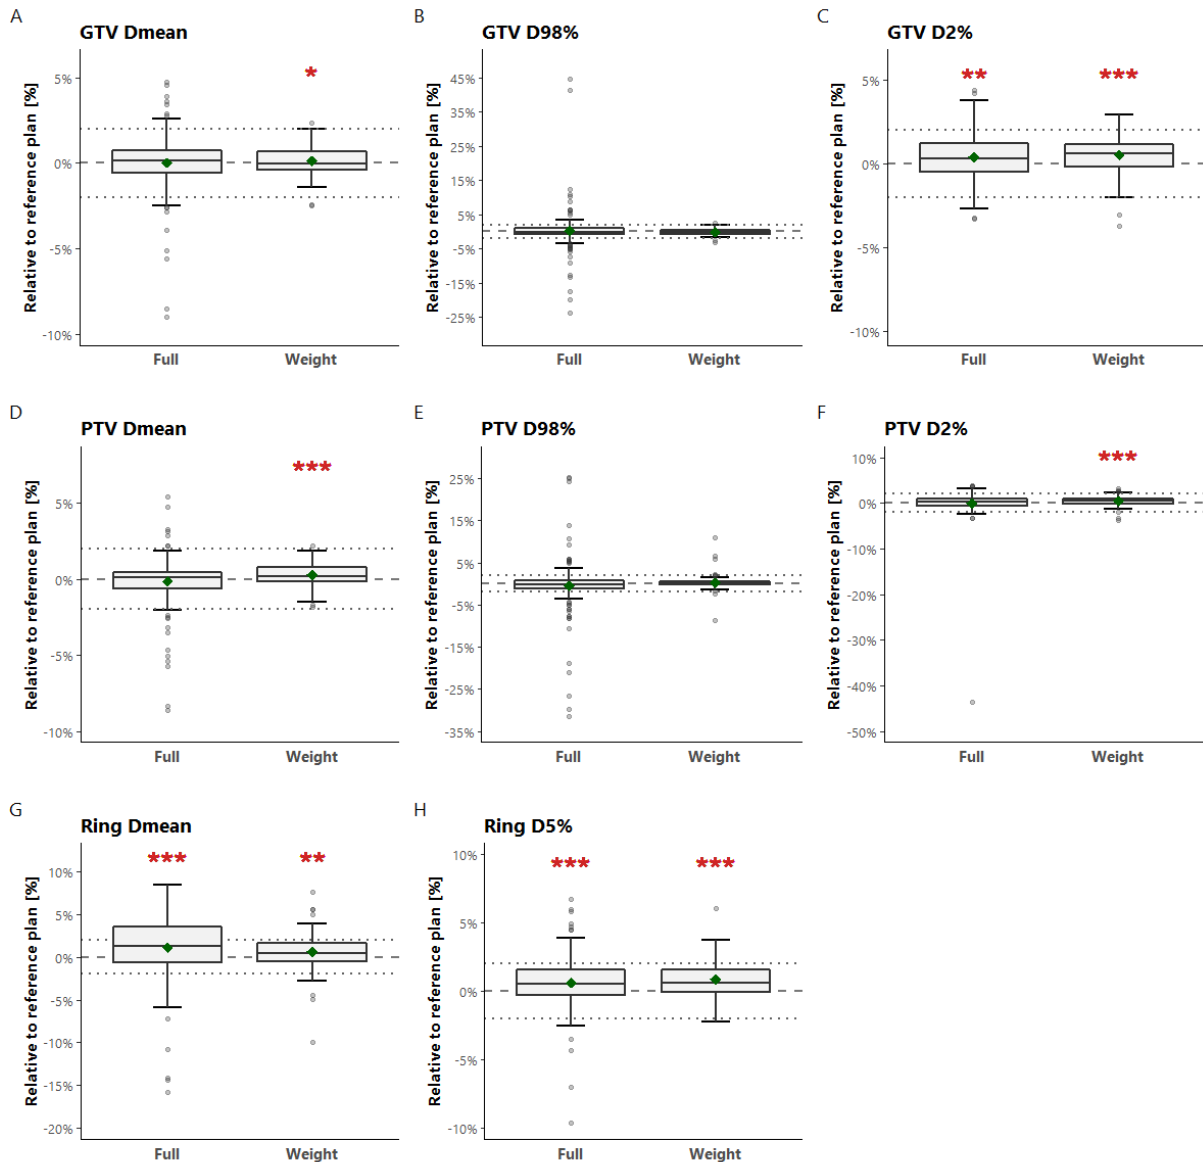

Figure S2: Boxplots representing the percentage differences in dose statistics with respect to reference treatment plans, only for those adapted plans that required a full optimization (left) or only weight optimization (right). (A-C) GTV, (D-F) PTV, (G-H) 2 cm ring around the PTV. Dashed lines indicate 0% and dotted lines indicate  $\pm 2\%$  differences. Asterisks indicate significance: p-value < 0.05 (\*), p-value < 0.01 (\*\*), and p-value < 0.001 (\*\*\*). GTV: Gross Tumor Volume, PTV: Planning Target Volume.

### 3. Average differences per patient

Figure S3 shows the mean difference per patient of the online-adapted treatment plans with respect to the reference treatment plan.

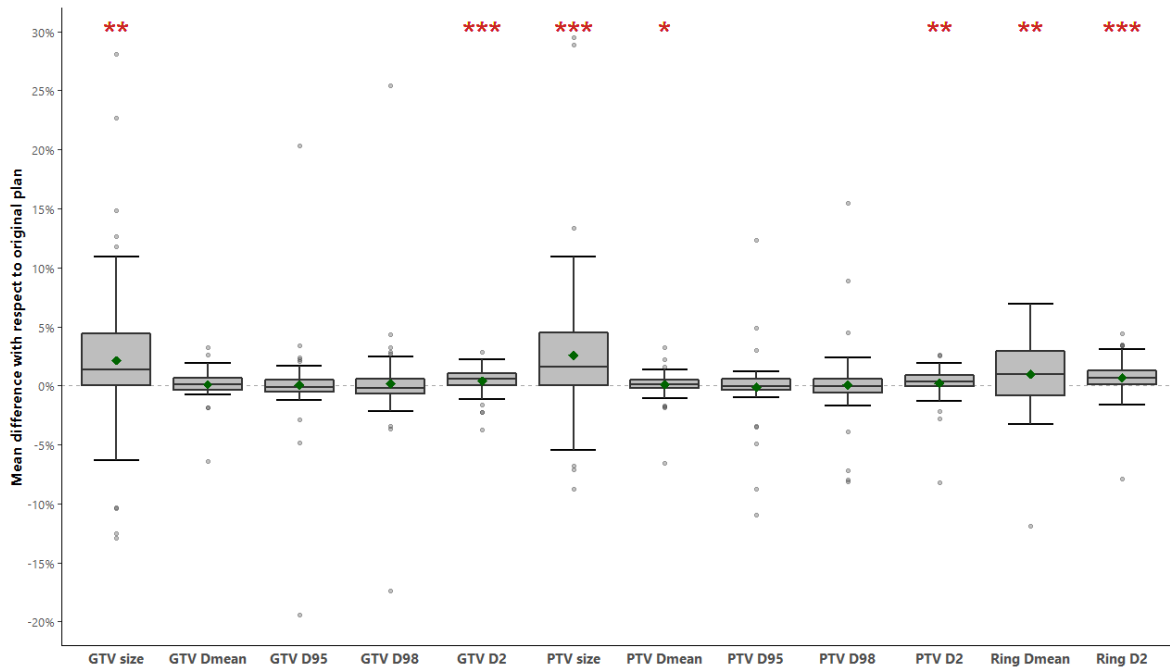

Figure S3: Boxplots indicating the average difference of adapted plans per patient with respect to original treatment plans. Diamonds indicate the mean. Dashed lines indicate 0% and dotted lines indicate  $\pm 2\%$  differences. Asterisks indicate significance:  $p$ -value $<0.05$  (\*),  $p$ -value $<0.01$  (\*\*), and  $p$ -value $<0.001$  (\*\*\*).

Figure S4 shows for the GTV dose parameters ( $D_{95\%}$  is omitted here, because it is comparable to the  $D_{98\%}$ ), the average change from the reference treatment plan, sorted from largest increase to largest decrease. The colors indicate the different treatment sites.

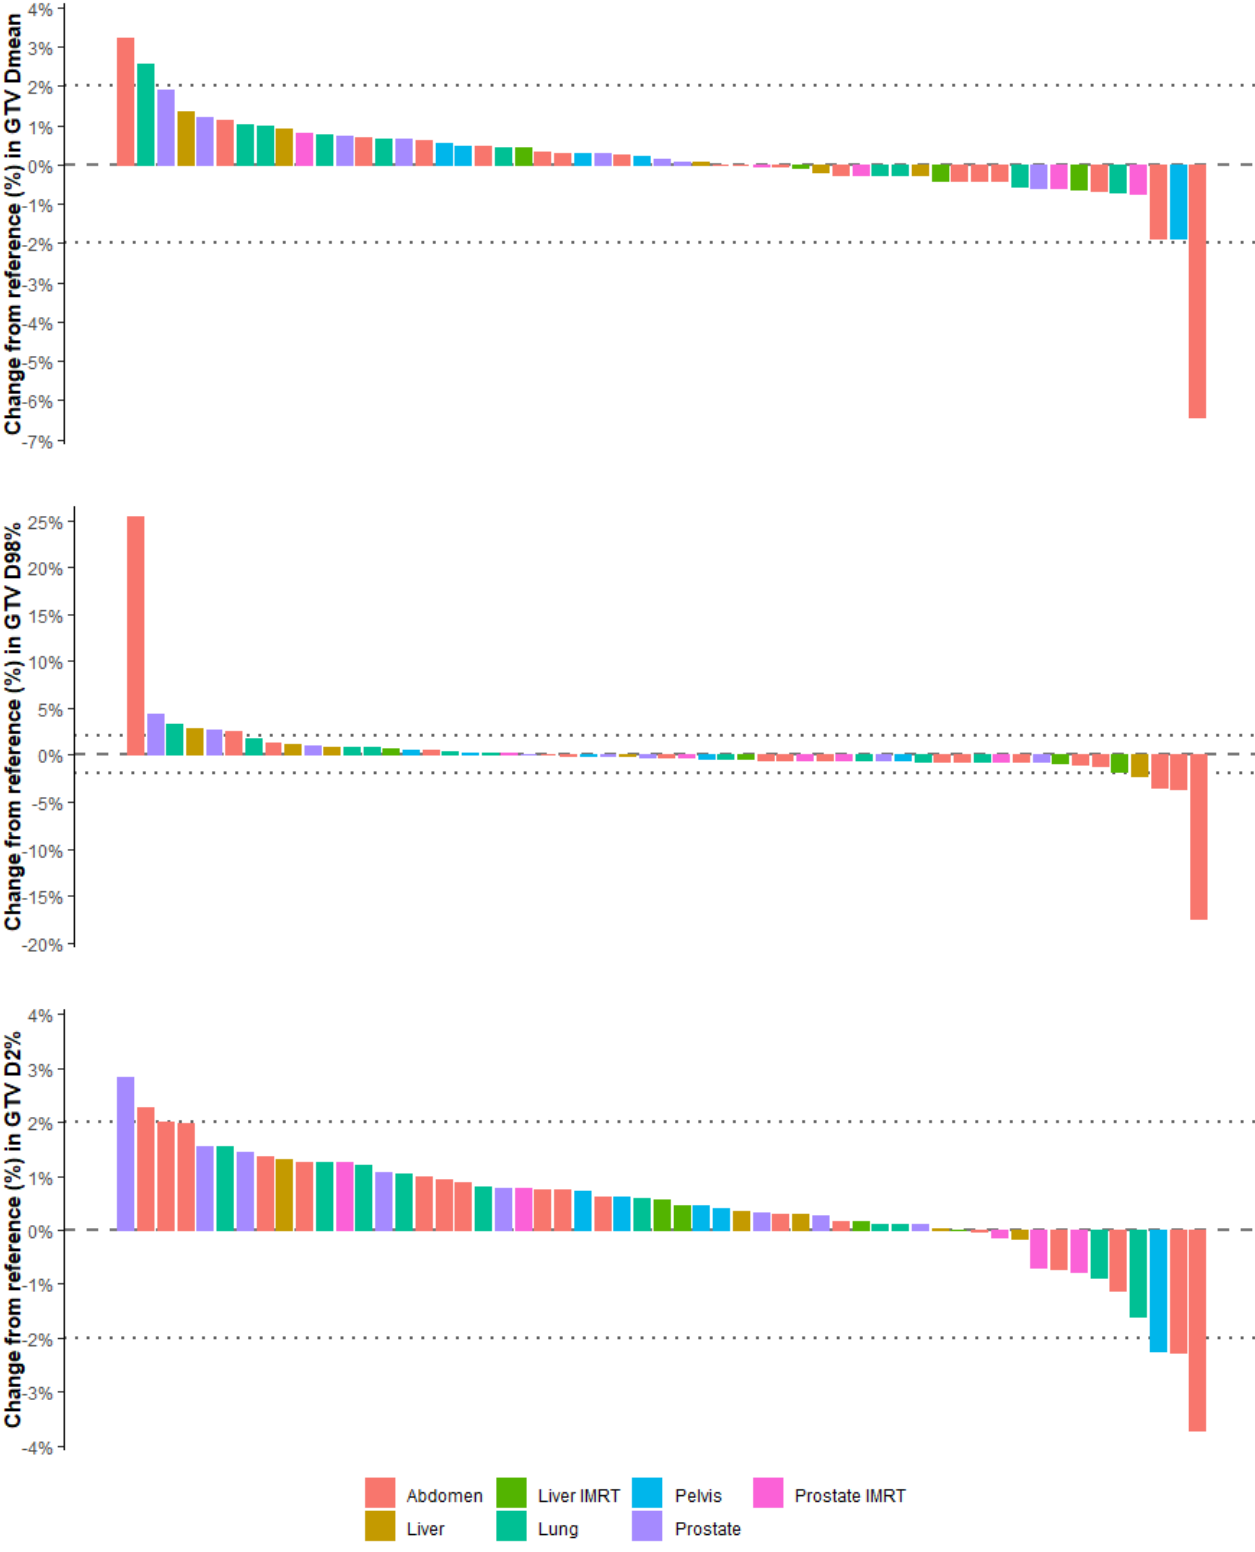

Figure S4: Waterfall plots for GTV parameters  $D_{mean}$ ,  $D_{98\%}$  and  $D_{2\%}$ , where each bar represents one patient, and is the average difference of all online-adapted plan of that patient and the reference plan. Dashed lines indicate 0% and dotted lines indicate  $\pm 2\%$  differences.
